# Supplementary material
Source: PubMed Central journal article supplement (PMC8831025)
Supplement: 15006_2021_651_MOESM1_ESM.pdf [file 15006_2021_651_MOESM1_ESM.pdf]

**Literatur**

1. Mäulen B. Ärztesundheit; Urban & Vogel, 2006
2. 119. Dt. Ärztetag Münster (2019): Wenn die Arbeit Ärzte krank macht; [https://www.bundesaerztekammer.de/fileadmin/user\\_upload/downloads/pdf-Ordner/BAEKground/Arztgesundheit.pdf](https://www.bundesaerztekammer.de/fileadmin/user_upload/downloads/pdf-Ordner/BAEKground/Arztgesundheit.pdf)
3. 124. Dt. Ärztetag, Online (2021): Beschluss zur Stärkung der psychosozialen Unterstützung für Ärztinnen und Ärzte; <https://www.bundesaerztekammer.de/aerztetag/aerztetage-der-vorjahre/124-daet-2021-online/beschlussprotokoll/>
4. Vogel R. Schluss mit dem Alkohol-Wege aus der Sucht. Almannach Edition, 2000
5. Gottschalk M. Alkohol und Medikamente - Wege aus der Abhängigkeit; Thieme Verlag, 1997
6. Mäulen B. Suchtkranke Ärzte in: Fehlzeitenreport AOK 2013. Kap 18, 1–9
7. Mundle G. Achtsamkeit in der Suchttherapie; Kohlhammer Verlag, 2017
8. <https://www.bundesaerztekammer.de/aerztetag/beschlussprotokolle-ab-1996/111-daet-2008/punkt-vi/ambulante-versorgung/1-suchtkranke-aerzte/>
9. Gellert R. Persönliche Mitteilung, 2021
10. Kalanithi P. When breath becomes air; Random House, 2016
11. Rau E. Krebs! Was nun Ebo? Verlag Dr. Eberhard Rau, 1999
12. Grotjahn A. Ärzte als Patienten; Thieme Verlag, 1929
13. Ripke T. Der kranke Arzt – Chance zum besseren Verständnis. Deutsches Ärzteblatt 97/2000 (5) A 237–239
14. Relman A. On breaking one's neck - a doctors near death experience, New York, 2014
15. Schwarz F W, Angerer P. Arbeitsbedingungen von Ärztinnen u. Ärzten, Report Versorgungsforschung, Bd. 2, Deutscher Ärzte Verlag, 2009
16. Mäulen B. Gewalt gegen Ärzte - Wenn Helfer zum Opfer werden. hautnah Dermatologie 29/2013;266–70
